# Supplementary material
Source: HighWire-hosted journal article supplement (https://ard.bmj.com/content/annrheumdis-2020-219748)

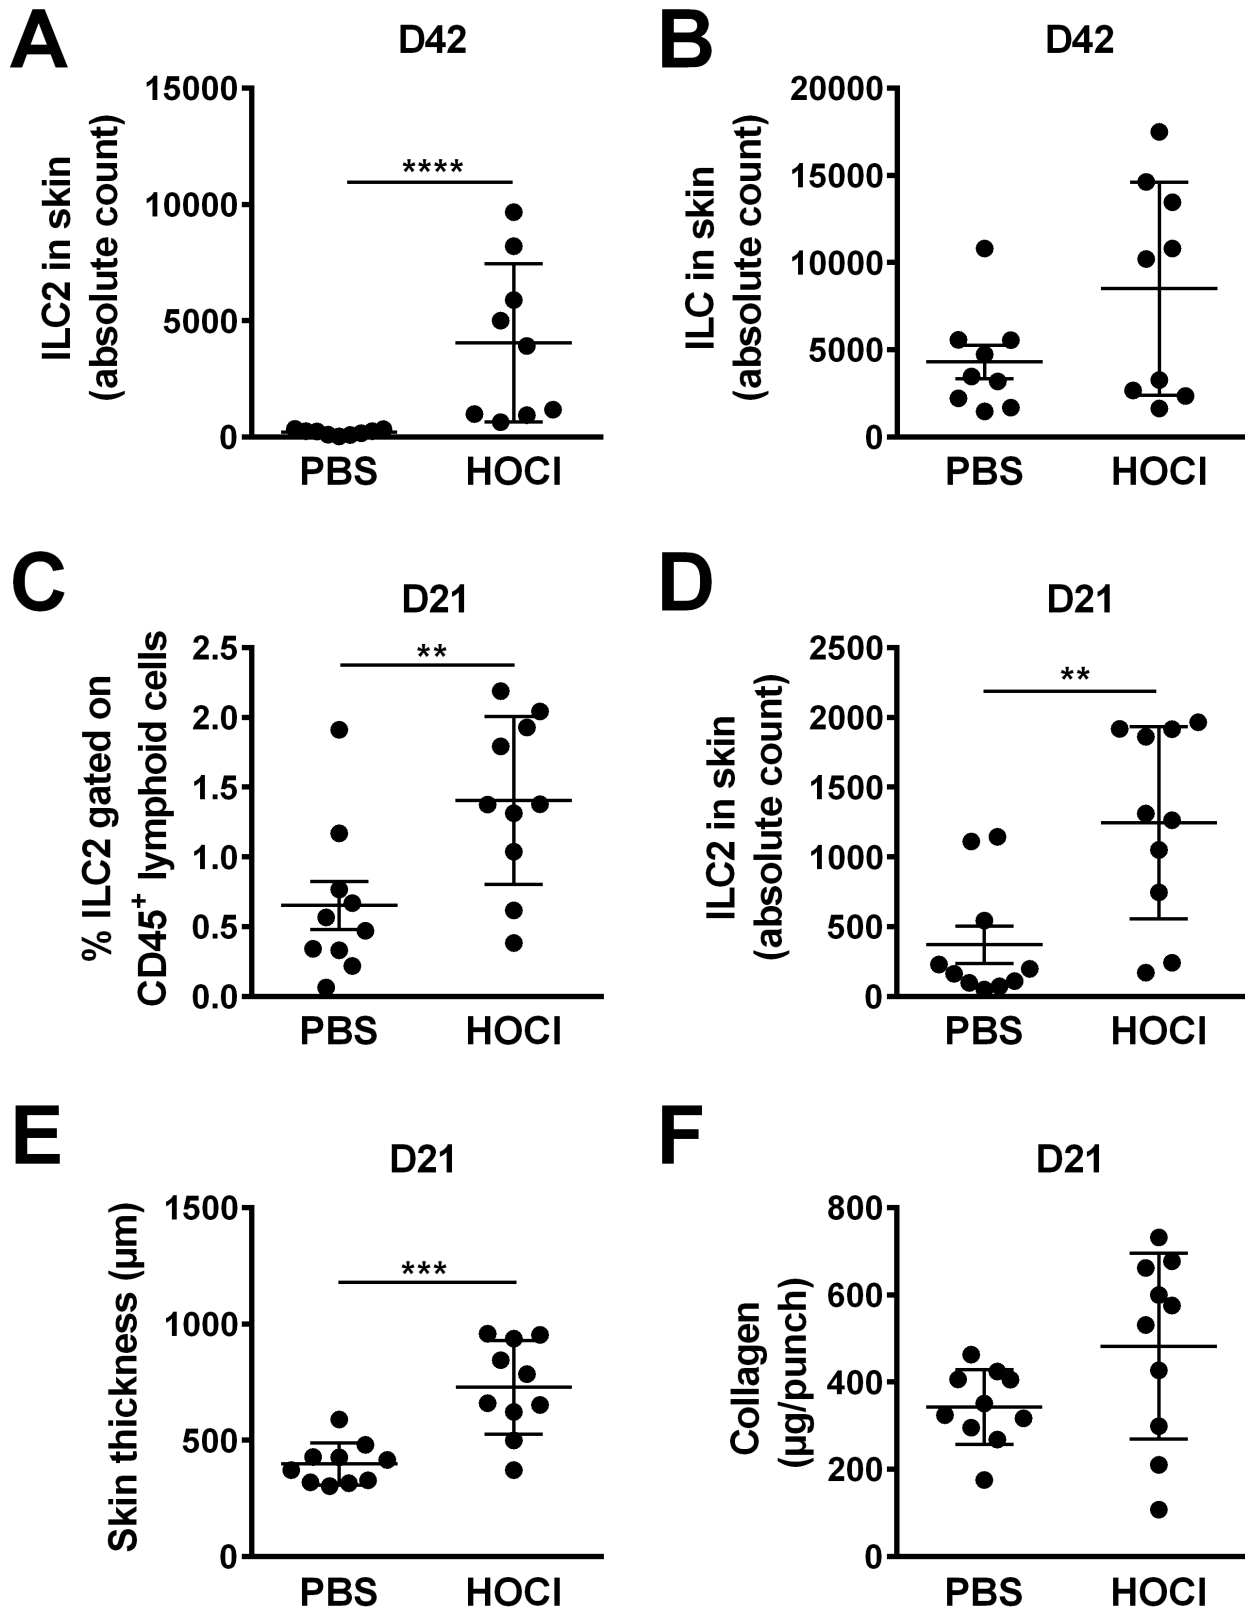

Supplement: inline-supplementary-material-6 [file inline-supplementary-material-6.pdf]

# TGF $\beta$ -induced natural ILC2 correlate with skin fibrosis

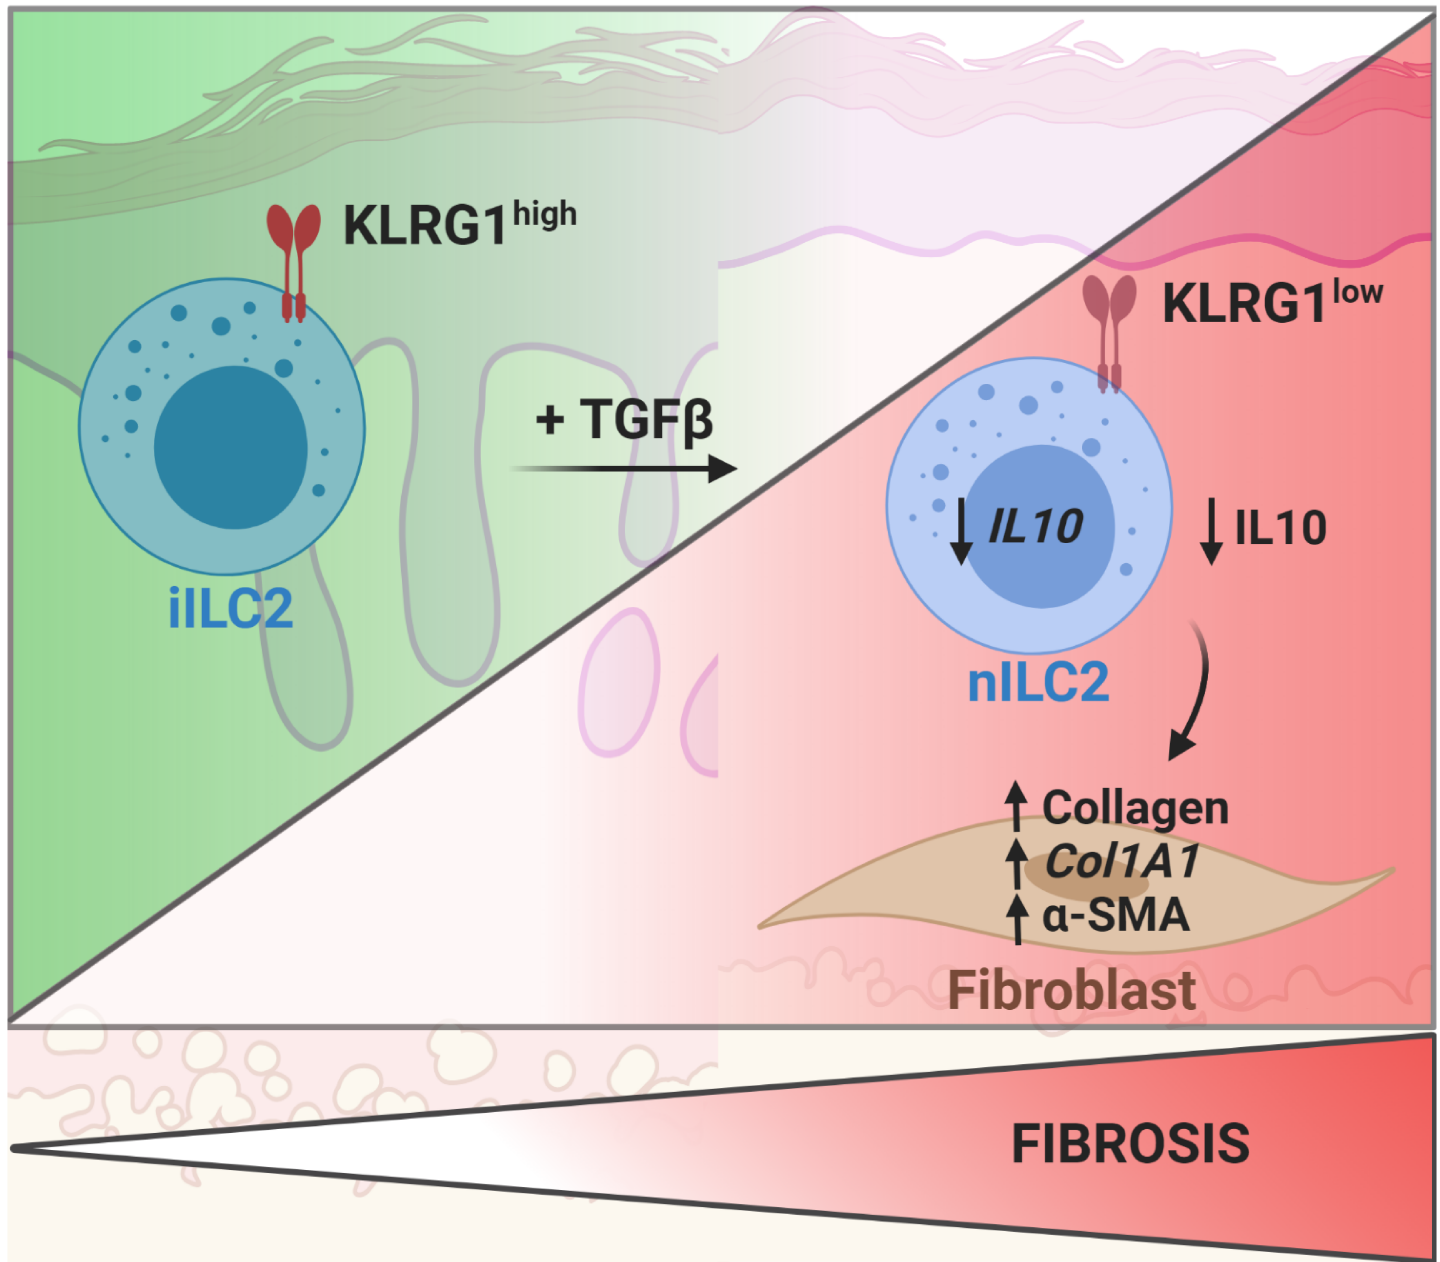

Supplement: inline-supplementary-material-7 [file inline-supplementary-material-7.pdf]

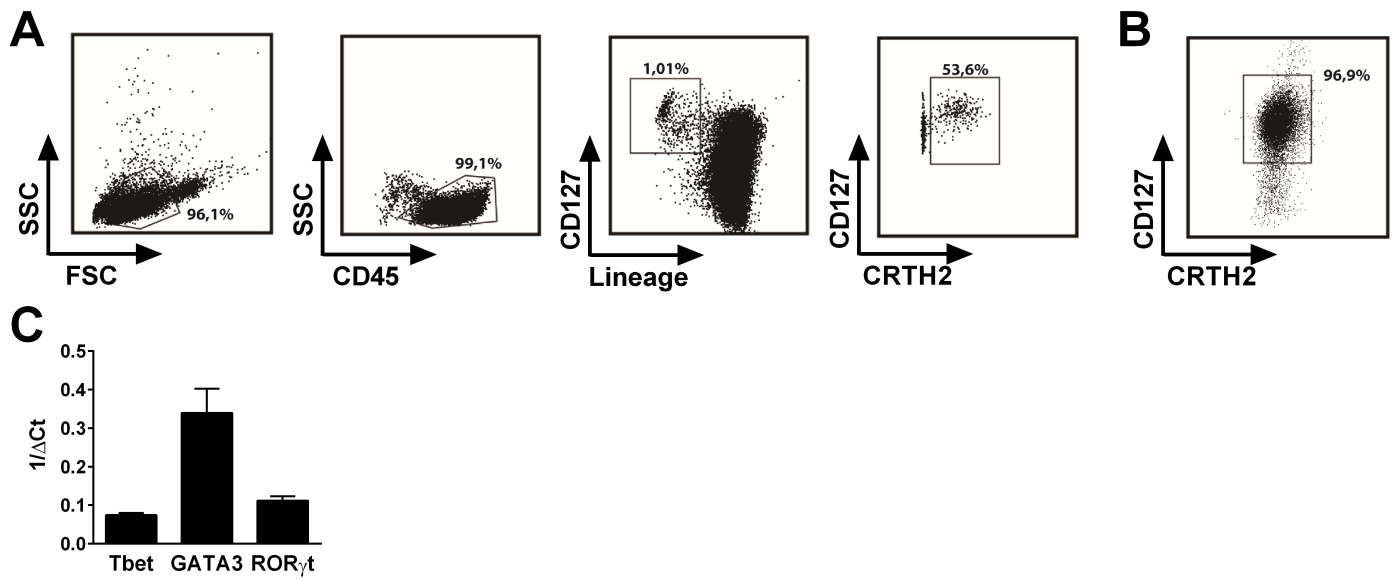

Supplement: inline-supplementary-material-4 [file inline-supplementary-material-4.pdf]
